# Supplementary material for: 27Al MQMAS of the δ-Al13-Keggin
Source: Royal Society of Chemistry journal article supplement (doi:10.1039/c6dt04263e), 2017-01-01
Supplement: c6dt04263e1.pdf [file c6dt04263e1.pdf]

## **$^{27}\text{Al}$ MQMAS of the $\delta\text{-Al}_{13}$ -Keggin**

C. D. Pilgrim<sup>\*a</sup>, J. R. Callahan<sup>\*a</sup>, C. A. Colla<sup>b</sup>, C. A. Ohlin<sup>c</sup>, H. E. Mason<sup>d</sup>,  
W. H. Casey<sup>a,b†</sup>

<sup>a</sup>Department of Chemistry and <sup>b</sup>Department of Earth and Planetary Sciences;  
University of California, Davis; Davis, CA

<sup>c</sup>Department of Chemistry; Umeå University; Umeå, Sweden

<sup>d</sup>Lawrence Livermore National Laboratory; Livermore, CA

To whom correspondence should be addressed:

Prof. W. H. Casey, E-mail address: [whcasey@ucdavis.edu](mailto:whcasey@ucdavis.edu)

*1. Fitting of the  $^{23}\text{Na}$  spectrum*

*2. Compiled list of parameters for the fit of the  $^{27}\text{Al}$  spectra*

## 1. Fitting of the $^{23}\text{Na}$ spectrum

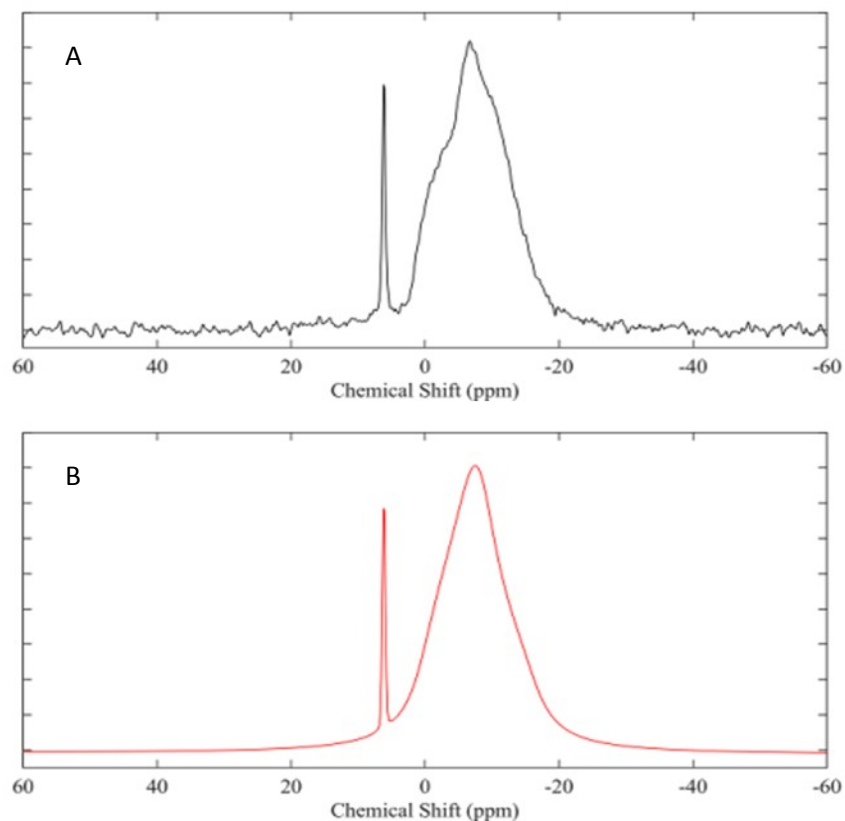

Figure S-1: One-dimensional  $^{23}\text{Na}$  spectrum of the  $\delta\text{-Al}_{13}$  cluster, with A) the experimental data, and B) the fit of the data using Dmfit. The sharp peak at 6.2 ppm is from residual NaCl in the solid while the broad peak centered at -6.7 ppm is due to the  $\text{Na}^+$  ion capping the  $\delta\text{-Al}_{13}$  ion.

| $\delta_{\text{iso}}$<br>(ppm) | Peak Fitting Model  | Amplitude (a.u.) | EM Parameter (a.u.) | $C_Q$ (MHz) | $\eta$ | Width (ppm) | G/L Ratio | Integrated Intensity (%) |
|--------------------------------|---------------------|------------------|---------------------|-------------|--------|-------------|-----------|--------------------------|
| 6.14                           | Gaussian/Lorentzian | 133.12           |                     |             |        | 0.50        | 0.82      | 3.70                     |
| 0.07                           | Q MAS 1/2           | 751.38           | 986.76              | 2.36        | 1.00   |             |           | 96.30                    |

Table S-1: Parameters for the fitting of the  $^{23}\text{Na}$  spectrum using Dmfit. Two types of models were used, a quadrupolar lineshape model (Q MAS 1/2) to account for the quadrupolar shape of the central transition, and a Gaussian/Lorentzian model to account for the sharp peak seen at 6.14 ppm.



## 2. Compiled list of parameters for the fit of the $^{27}\text{Al}$ spectra

| Peak Number | $\delta_{\text{iso}}$ (ppm) | Peak Fitting Model  | Amplitude (a.u.) | EM Parameter (a.u.) | $C_Q$ (MHz) | $\eta$ | Width (ppm) | G/L Ratio | Integrated Intensity (%) |
|-------------|-----------------------------|---------------------|------------------|---------------------|-------------|--------|-------------|-----------|--------------------------|
| 1           | 4.53                        | Q MAS 1/2           | 250.62           | 1407.52             | 4.55        | 0.04   |             |           | 21.41                    |
| 2           | 6.17                        | Q MAS 1/2           | 160.96           | 528.28              | 6.24        | 0.68   |             |           | 26.79                    |
| 3           | 5.77                        | Q MAS 1/2           | 91.68            | 255.66              | 10.57       | 0.20   |             |           | 44.20                    |
| 4           | 67.75                       | Q MAS 1/2           | 100.39           | 410.52              | 4.06        | 0.45   |             |           | 7.10                     |
| 5           | 60.20                       | Gaussian/Lorentzian | 7.75             |                     |             |        | 1.96        | 1.0       | 0.50                     |

Table S-2: Parameters for the fitting of the  $^{27}\text{Al}$  spectrum using Dmfit. Two types of models were used, a quadrupolar lineshape model (Q MAS 1/2) to account for the quadrupolar shape of the central transition, and a Gaussian/Lorentzian model to account for the sharp peak seen at 60.20 ppm.
